# Supplementary material for: Engineering surface-exposed LaCoO3 perovskite nanotubular catalysts for catalytic combustion of toluene through acid etching
Source: Royal Society of Chemistry journal article supplement (doi:10.1039/d4ta08541h), 2025-01-01
Supplement: d4ta08541h1.pdf [file d4ta08541h1.pdf]

# Supporting Information

## Engineering surface exposed LaCoO<sub>3</sub> perovskite nanotubular catalyst for catalytic combustion of toluene through acid etching

Shixing Wu<sup>a, b#</sup>, Zhan Shi<sup>a, c#</sup>, Fang Dong<sup>a</sup>, Xin Song<sup>c</sup>, Weiliang Han<sup>a, c\*</sup>, Weigao Han<sup>a</sup>,  
Haitao Zhang<sup>d</sup>, Xiuyan Dong<sup>c</sup>, Zhicheng Tang<sup>a, c\*</sup>

*(<sup>a</sup> National Engineering Research Center for Fine Petrochemical Intermediates, State Key Laboratory for Oxo Synthesis and Selective Oxidation, Lanzhou Institute of Chemical Physics, Chinese Academy of Sciences, Lanzhou 730000, China.*

*<sup>b</sup> University of Chinese Academy of Sciences, Beijing 100039, China.*

*<sup>c</sup> Shandong Laboratory of Advanced Materials and Green Manufacturing at Yantai, Yantai Zhongke Research Institute of Advanced Materials and Green Chemical Engineering, Yantai 264006, China.*

*<sup>d</sup> Lanzhou Petrochemical Research Center, Petrochemical Research Institute, PetroChina, Lanzhou 730060, China.*

*<sup>e</sup> School of Chemistry and Chemical Engineering, Lanzhou Jiaotong University, Lanzhou 730070, China.)*

*#These authors contributed equally: Shixing Wu, Zhan Shi.*

---

\*Corresponding author.

E-mail address: tangzhicheng@licp.cas.cn (Z. Tang), weilianghan@licp.cas.cn (W. Han).

## 1. Catalyst characterizations

The morphology of the catalyst samples was analyzed by transmission electron microscopy (TEM, JEOL-JEM-2010). Scanning electron microscope (SEM) images of the samples were obtained by a JSM-6701F cold field emission scanning electron microscope. The crystal phases of each element in the catalyst were determined by an X-ray diffraction instrument (XRD, Japan Smartlabse) (scanning angle of  $10^{\circ}$ - $90^{\circ}$ , scanning speed of  $0.5^{\circ}/\text{min}$ , 60 kV, 55 mA) under the radiation of  $\lambda=1.5406$  nm. The Fourier transform infrared spectroscopy (FTIR) analysis of the samples was performed using a Fourier infrared spectrometer (Nexus 870, Nicolet), and ATR technology was used for FTIR analysis. Brunauer-Emmett-Teller (BET) surface area, the pore size, and the pore volume of the catalysts were obtained by adsorption and desorption of nitrogen in the ASAP 2020 instrument (America Micromeritics). The real content of each metal on the catalyst was obtained by measuring each catalyst with an Agilent ICP-OES 730 instrument. Infrared spectra were tested with a Nicolet Nexus 870 Fourier transform infrared spectrometer. X-ray photoelectron spectroscopy (XPS) measurements were performed with a Thermo Scientific 250 Xi.

The multifunctional dynamic adsorption instrument TP-5080-D was used to analyze the acidity and redox capacity of the catalyst surface. For  $\text{H}_2$ -TPR, a 50 mg sample was heated from room temperature to  $900^{\circ}\text{C}$  in reduced gas with volume fractions of 5 vol %  $\text{H}_2$  and 95 vol %  $\text{N}_2$ , and the detector signal was continuously recorded. For the  $\text{O}_2$ -TPD test, the catalyst (50 mg) was pretreated with nitrogen (99.9%) for 1 h at  $300^{\circ}\text{C}$ . When the temperature dropped to  $50^{\circ}\text{C}$ , the  $\text{O}_2$  (5%  $\text{O}_2/\text{N}_2$ )

adsorption was carried out for 60 min. After the adsorption was over, purged for 0.5 h, and the desorbed O<sub>2</sub> signal was detected at 50-900 °C. The temperature-programmed desorption operation of NH<sub>3</sub>-TPD and SO<sub>2</sub>-TPD was similar to that of O<sub>2</sub>-TPD, except that O<sub>2</sub> was changed to NH<sub>3</sub> and SO<sub>2</sub>.

## 2. Catalytic activity measurements

The activity and stability of the catalysts were tested with the help of toluene (C<sub>7</sub>H<sub>8</sub>) as a probe molecule, which was essential for the study of the catalytic oxidation performance of VOCs. The catalytic oxidation of toluene was evaluated by using a fixed-bed flow reactor operating at steady-state flow mode. Then, 0.4 g catalysts (40-60 mesh) and 0.7 g quartz sand (40-60 mesh) were mixed uniformly. They were put onto the reactor. The reaction gas containing VOCs (3000 ppm) was generated by bubbling air through a VOC saturator, and then passed through the reactor with a weight hourly space velocity (WHSV) of 30000 ml g<sup>-1</sup> h<sup>-1</sup>. The first temperature was 100 °C. The activity was measured per 20 °C. Before each test, it needed to stabilize for 1 h. Reactants and products were analyzed with an online GC-6820 gas chromatograph with a flame ionization detector, Conversion was defined as. The conversion efficiency of C<sub>7</sub>H<sub>8</sub> was calculated by the following equation:

$$x = \frac{C_{in} - C_{out}}{C_{in}} \times 100\%$$

Where x is the conversion of C<sub>7</sub>H<sub>8</sub>, C<sub>in</sub> and C<sub>out</sub> are the inlet and outlet concentrations of C<sub>7</sub>H<sub>8</sub> in the gas phase.

## 3. In situ FTIR measurement

In situ diffuse reflectance infrared Fourier transform spectroscopy (DRIFTS) spectra were collected with VERTEX 70 spectrometer equipped with an MCT detector and a CaF<sub>2</sub> window in-situ cell. DRIFTS cell was used as the reaction chamber and the spectra were collected in the frequency range of 4000-600 cm<sup>-1</sup>. 200 mg grain catalyst (40-60 mesh) was packed in the DRIFTS cell. For C<sub>7</sub>H<sub>8</sub> adsorption spectra, the LCCO-2 catalysts were pretreated at 300 °C by flowing N<sub>2</sub> for 30 min. After the temperature cooled to 50 °C, it was exposed to 15 ppm C<sub>7</sub>H<sub>8</sub>/ N<sub>2</sub> feed at a flow rate of 25 mL/min, and the adsorption was saturated. Subsequently, the adsorption saturation was reached at different temperatures (50 °C, 100 °C, 150 °C, 200 °C, 250 °C and 300 °C). For the oxidation of C<sub>7</sub>H<sub>8</sub>, the LCCO-2 catalyst was treated with air, and then the 15 ppm C<sub>7</sub>H<sub>8</sub> in Ar was pre-adsorbed on the clean samples at 50 °C for 30 min. Subsequently, the air with a flow of 25 mL/min was poured and the in situ FTIR spectra were collected at different temperatures with a heating rate of 10 °C/min.

#### 4. Kinetic studies

The catalytic performance could also be identified by kinetic studies, such as apparent activation energy ( $E_a$ ), which was measured as follows:

$$\ln r = \frac{-E_a}{RT} + C \quad (1)$$

In equation (1),  $r$  represented the reaction rate (mol·s<sup>-1</sup>),  $T$  referred to the reaction temperatures, and  $C$  was a constant term.

$$r = \frac{F \times X_{toluene}}{W} \quad (2)$$

In equation (2),  $X_{\text{toluene}}$  denoted the conversion of toluene,  $F$  indicated the feeding rate ( $\text{mol}\cdot\text{s}^{-1}$ ), and  $W$  corresponded to the mass of the catalyst. Therefore, the plots of  $\ln r$  and  $1000/T$  yielded the  $E_a$  value.

The kinetic studies also included specific reaction rates, such as the catalyst's mass ( $R_m$ ), which was calculated required the following equation:

$$R_m = \frac{F \times \eta_{\text{toluene}}}{W} \quad (3)$$

$$\eta_{\text{toluene}} = \log \frac{1}{1 - \frac{X_{\text{toluene}}}{100}} \quad (4)$$

Turnover frequency (TOF), defined as the number of toluene molecules converted per active site per second, is calculated according to the equation:

$$\text{TOF} = \frac{F_{\text{toluene}} * X_{\text{toluene}}}{\frac{(x(\text{Co}^{3+}) * x(\text{Co}) + x(\text{Ce}^{3+}) * x(\text{Ce}))}{M_{\text{Cat}}} * m_{\text{Cat}}} \quad (5)$$

Where  $F_{\text{toluene}}$  is the propane flow rate ( $\text{mol/s}$ ),  $X_{\text{toluene}}$  is the conversion of toluene,  $m_{\text{cat}}$  is the mass of the catalyst ( $\text{g}$ ),  $M_{\text{Cat}}$  ( $\text{g}$ ) is the molar of the catalysts,  $x(\text{Co}^{3+})$  are the ratios of  $\text{Co}^{3+}/\text{Co}_{\text{total}}$ ,  $x(\text{Ce}^{3+})$  are the ratios of  $\text{Ce}^{3+}/\text{Ce}_{\text{total}}$  respectively;  $x(\text{Co})$  is the total contents of Co in various samples and  $x(\text{Ce})$  is the total contents of Ce in various samples (obtained by XPS experiments).

## 5. Computational Method

The Dmol<sup>3</sup> program in the Material Studio 2017 software suite was used to complete all calculations [1]. The molecular geometry, including the anatase LaCoO<sub>3</sub> (110), La<sub>0.9</sub>Ce<sub>0.1</sub>CoO<sub>3</sub> (110) and vLa<sub>0.9</sub>Ce<sub>0.1</sub>CoO<sub>3</sub> (110) surface, C<sub>7</sub>H<sub>8</sub>, was optimized using the GGA/PBE approach with a DNP basis [2]. For the core electrons of H, C, and O, the all-electron method was implemented, whereas for La, Co and Ce, the density functional semi-core pseudopotential method was used. The spin-polarized set was employed for all calculations, and the Grimme method was used for DFT-D correction. The values of  $1.0 \times 10^{-6}$  hartree (Ha),  $1.0 \times 10^{-5}$  Ha,  $2.0 \times 10^{-3}$  Ha/Å, and  $5.0 \times 10^{-3}$  Å, respectively, were the tolerances for SCF, energy, gradient, and displacement convergence [3]. At the same theoretical level, the electronic energies and zero-point vibration energies (ZPVE) were estimated.

## References

1. B. Delley, From molecules to solids with the DMol<sup>3</sup> approach, *J. Chem. Phys.*, 2000, **113**, 7756-7764.
2. J.P. Perdew, K. Burke and M. Ernzerhof, Generalized gradient approximation made simple, *Phys. Rev. Lett.*, 1996, **77**, 3865-3868.
3. T. Zhu, X. Song, T. Li, J. Hu, K. Qi, P. Gao, R. Cui and Z. Tang. Simultaneous catalytic removal of complex sulfur-containing VOCs over Mn-based hydrotalcite-like compounds: Active sites and oxidation mechanism. *Sep. Purif. Technol.*, 2024, **339**, 126694.
4. M. Wu, S. Ma, S. Chen and W. Xiang, Fe-O terminated LaFeO<sub>3</sub> perovskite oxide surface for low temperature toluene oxidation, *J. Clean. Prod.*, 2020, **277**, 123224.
5. Z. Sahaib, F. Puleo, G. Pantaleo, V. La Parola, J.L. Valverde, S. Gil, L.F. Liotta and A. Giroir-Fendler, The effect of citric acid concentration on the properties of LaMnO<sub>3</sub> as a catalyst for hydrocarbon oxidation, *Catal.*, 2019, **9**, 226.
6. H. Chen, G. Wei, X. Liang, P. Liu, H. He, Y. Xi and J. Zhu, The distinct effects of substitution and deposition of Ag in perovskite LaCoO<sub>3</sub> on the thermally catalytic oxidation of toluene, *Appl. Surf. Sci.*, 2019, **489**, 905–912.
7. C. Lv, J. Zhang, L. Yan, H. Chen and M. Hu, Boosting sulfur tolerance and catalytic performance in toluene combustion via enhanced-mechanism of Ce-Fe dopants incorporation of LaCoO<sub>3</sub> perovskite, *J. Environ. Chem. Eng.*, 2022, **10**, 108372.
8. Y. Li, S. Liu, K. Yin, D. Jia, Y. Sun, X. Zhang, J. Yan and L. Yang, Understanding

the mechanisms of catalytic enhancement of La-Sr-Co-Fe-O perovskite-type oxides for efficient toluene combustion, *J. Environ. Chem. Eng.*, 2023, **11**, 109050.

9. Z. Shi, F. Dong, W. Han, X. Dong and Z. Tang, Engineering  $\text{Co}_3\text{O}_4@3\text{DOM}$   $\text{LaCoO}_3$  multistage-pore nanoreactor with superior  $\text{SO}_2$  resistance for toluene catalytic combustion, *Nanoscale*, 2024, **16**, 10760–10778.



**Table S1**

Comparison of catalysts reported in the literature for catalytic oxidation of toluene with this work.

| Catalysts                                                                                | T <sub>50</sub><br>(°C) | T <sub>90</sub><br>(°C) | Concentration<br>(ppm) | GHSV<br>mL (g·h) <sup>-1</sup> | Ref.      |
|------------------------------------------------------------------------------------------|-------------------------|-------------------------|------------------------|--------------------------------|-----------|
| LaFeO <sub>3</sub>                                                                       | 308                     | 333                     | 1000                   | 20000                          | [4]       |
| LaMnO <sub>3</sub>                                                                       | 229                     | 298                     | 1000                   | 60000                          | [5]       |
| LaCoO <sub>3</sub>                                                                       | 290                     | 331                     | 1000                   | 30000                          | [6]       |
| La <sub>0.95</sub> Ag <sub>0.05</sub> CoO <sub>3</sub>                                   | 238                     | 268                     | 1000                   | 30000                          | [6]       |
| La <sub>0.6</sub> Ce <sub>0.4</sub> Co <sub>0.6</sub> Fe <sub>0.4</sub> O <sub>3</sub>   | 190                     | 318                     | 1000                   | 60000                          | [7]       |
| La <sub>0.5</sub> Sr <sub>0.5</sub> Co <sub>0.8</sub> Fe <sub>0.2</sub> O <sub>3-δ</sub> | 251                     | 270                     | 1000                   | 30000                          | [8]       |
| Co <sub>3</sub> O <sub>4</sub> @LaCoO <sub>3</sub>                                       | 229                     | 254                     | 3000                   | 30000                          | [9]       |
| LCCO-2                                                                                   | 203                     | 241                     | 3000                   | 30000                          | This work |
| LCCO-4                                                                                   | 211                     | 253                     | 3000                   | 30000                          | This work |

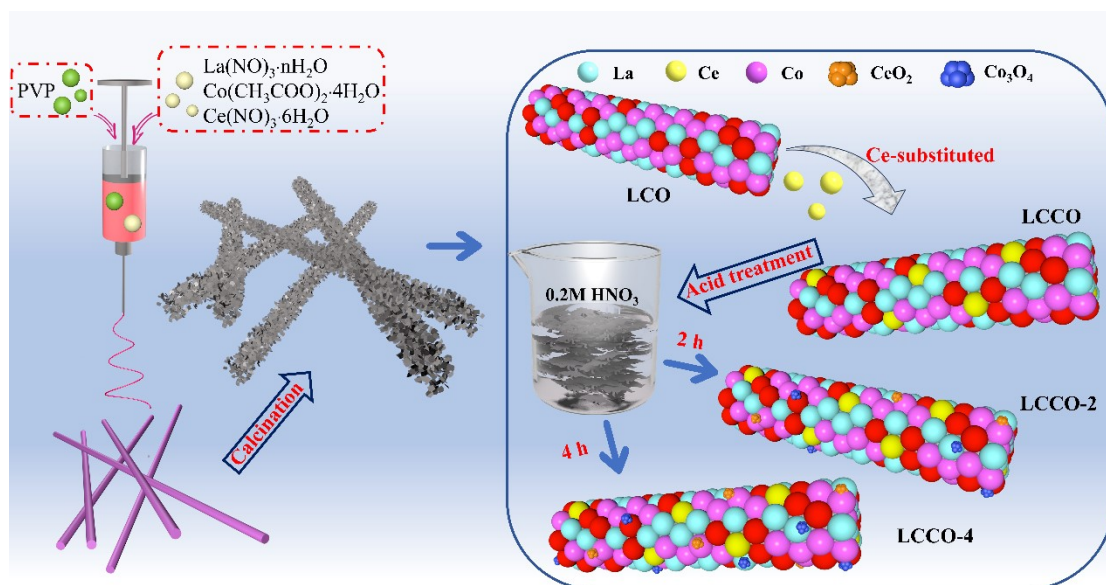

Fig. S1. Schematic diagram of the synthesis process for catalysts.

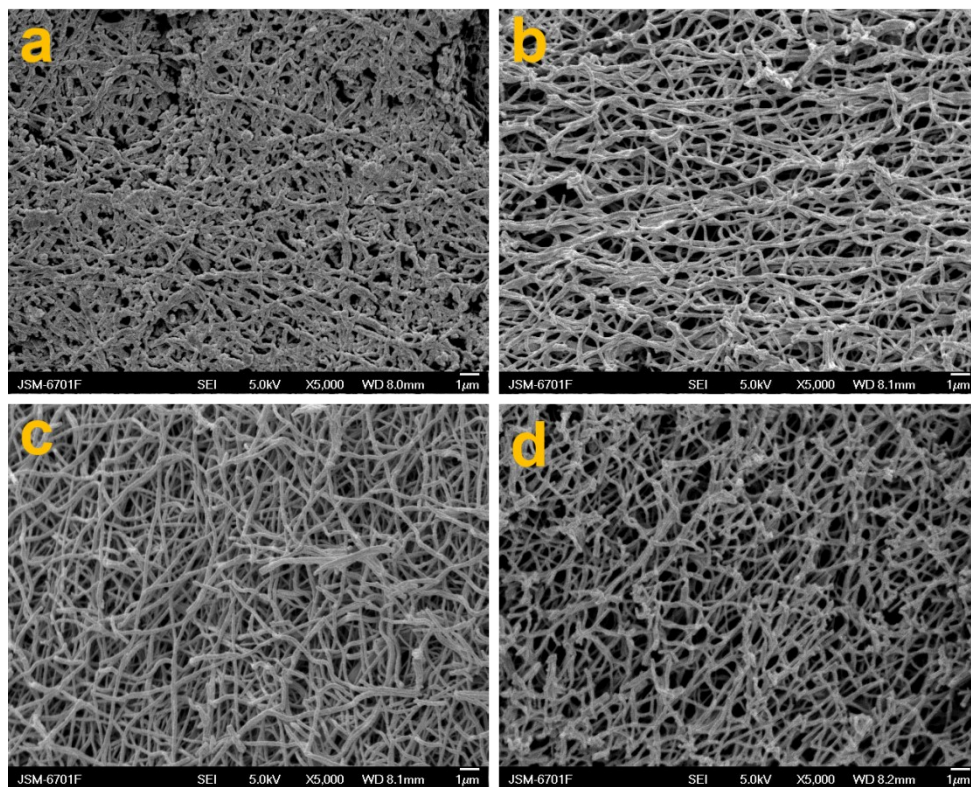

**Fig. S2.** SEM images of (a) LCO, (b) LCCO, (c) LCCO-2 and (d) LCCO-4 catalysts.

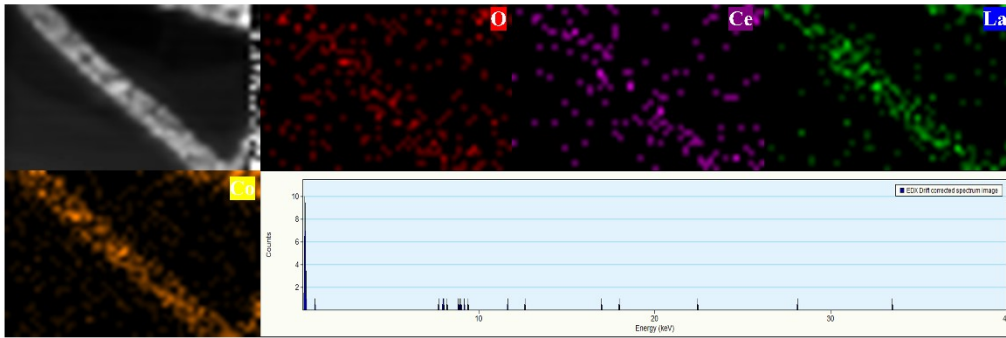

**Fig. S3.** Mapping analysis of LCCO catalyst.

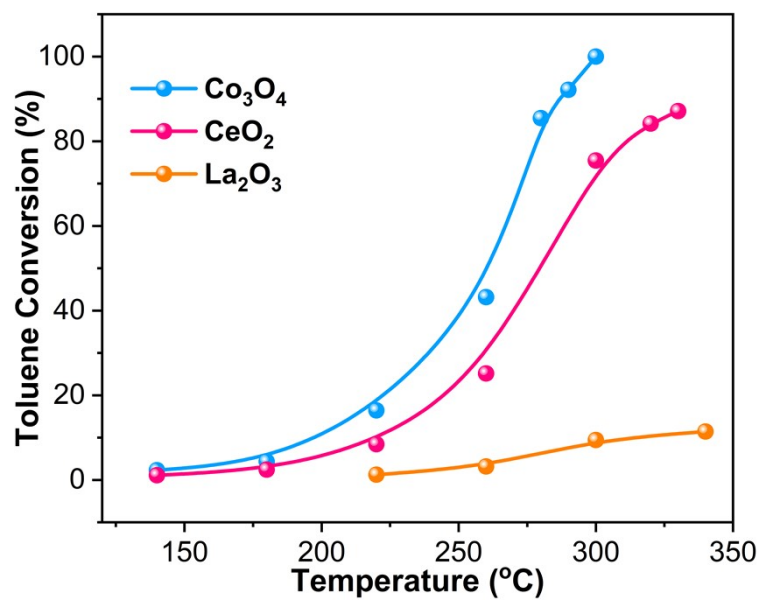

**Fig. S4.** Activity diagram of Co<sub>3</sub>O<sub>4</sub>, CeO<sub>2</sub> and La<sub>2</sub>O<sub>3</sub> catalysts for the catalytic combustion of toluene.

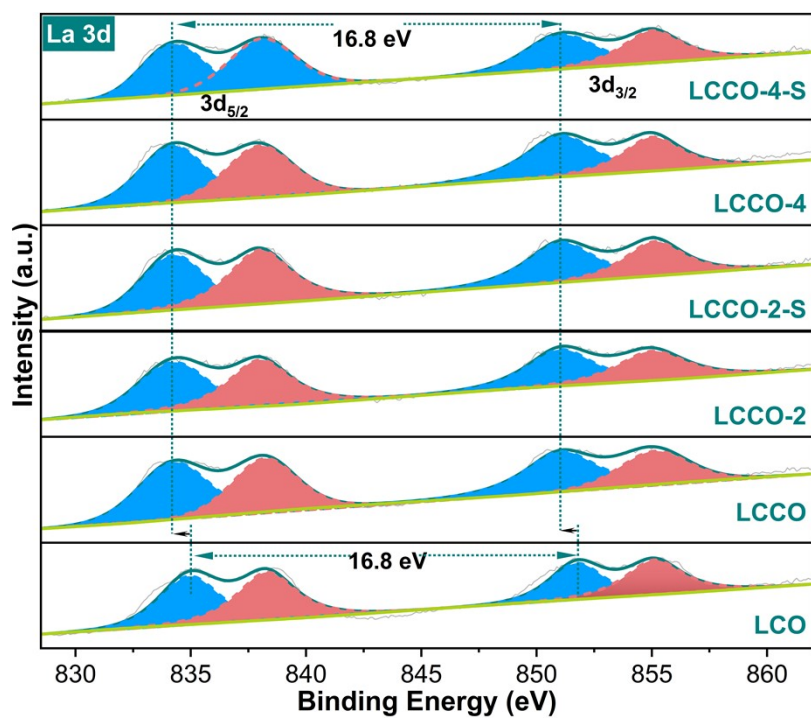

Fig. S5. XPS spectra of the La 3d on synthesized materials.

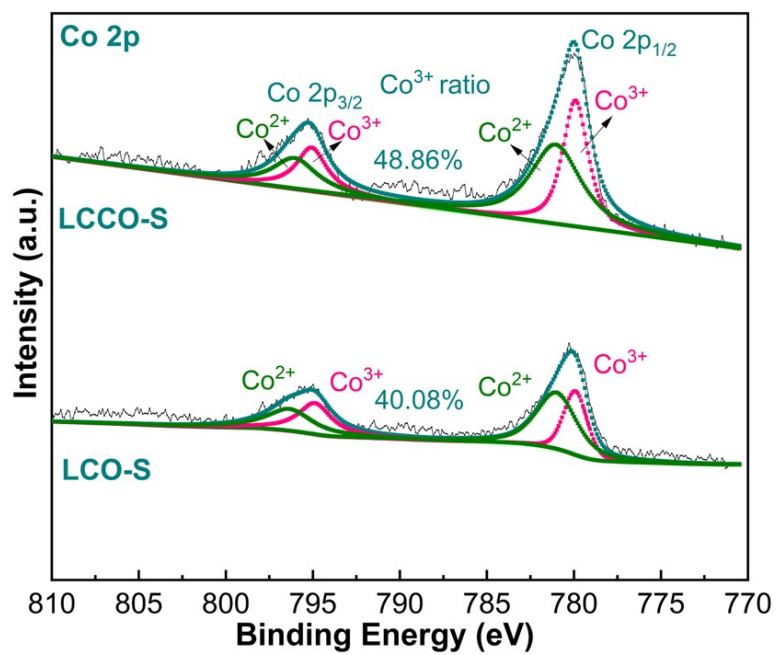

Fig. S6. XPS spectra of the Co 2p on LCO-S and LCCO-S materials.

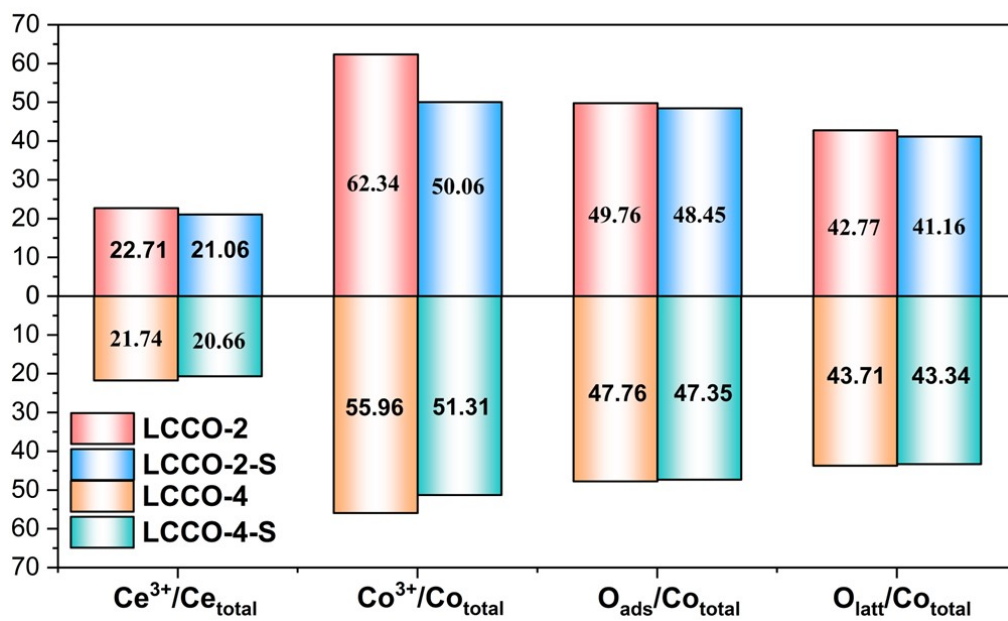

**Fig. S7.** Changes in  $Co^{3+}/Co_{total}$ ,  $Ce^{3+}/Co_{total}$ ,  $O_{ads}/O_{total}$ ,  $O_{latt}/O_{total}$  after sulfur fluxing.



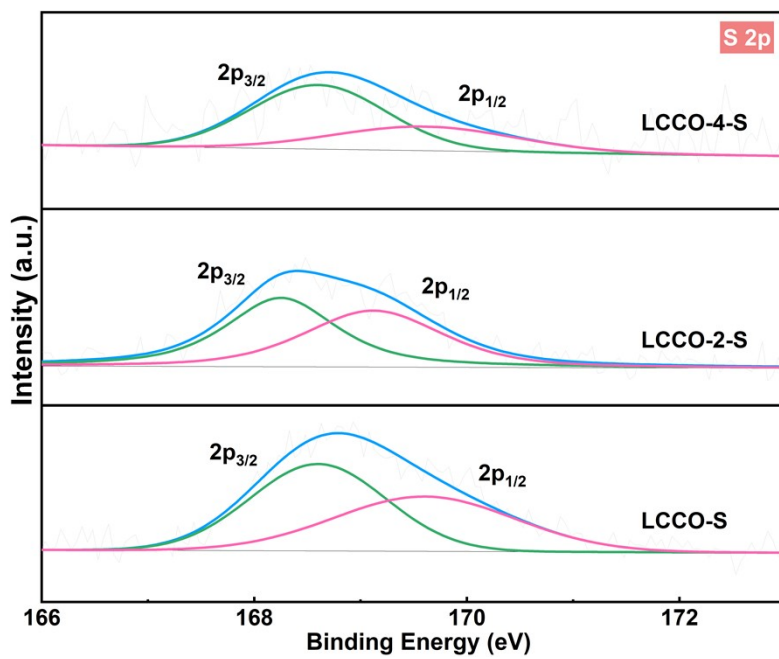

**Fig. S8.** XPS spectra of the S 2p on LCCO-S, LCCO-2-S and LCCO-4-S materials.

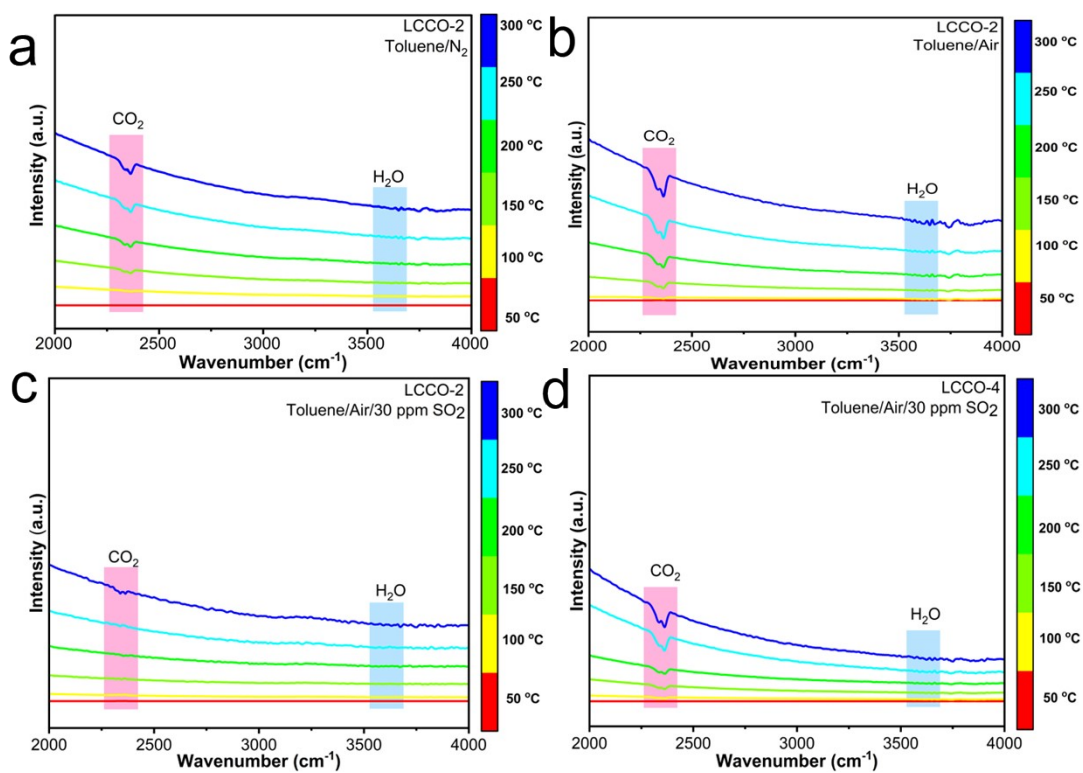

**Fig. S9.** In situ FTIR spectra of LCCO-2 catalyst exposed to (a) the flow of 15 ppm toluene and pure N<sub>2</sub> atmosphere, (b) the flow of 15 ppm toluene and air atmosphere, (c) the flow of 15 ppm toluene, 30 ppm SO<sub>2</sub> and 20% O<sub>2</sub>/N<sub>2</sub> atmosphere; In situ FTIR spectra of LCCO-4 catalyst exposed to (d) the flow of 15 ppm toluene, 30 ppm SO<sub>2</sub> and 20% O<sub>2</sub>/N<sub>2</sub> atmosphere.

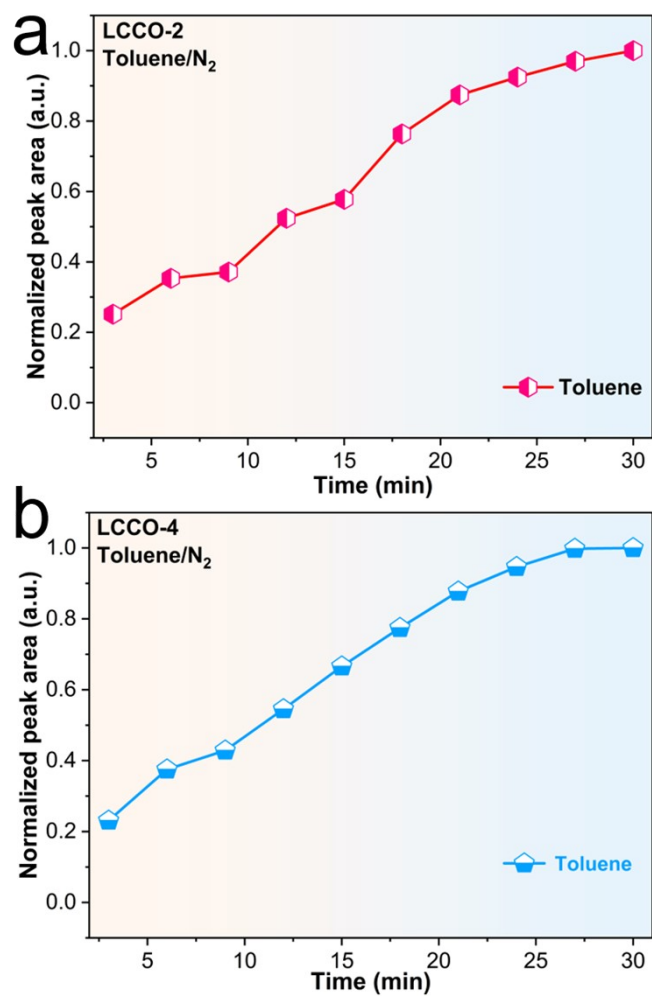

**Fig. S10.** The adsorption profiles of LCCO-2 and LCCO-4 catalysts exposed to 15 ppm toluene for different times.
